# Supplementary material
Source: Springer Nature journal article supplement (https://www.springermedizin.de/resource/supplementary/12885_2008_1508_MOESM2_ESM.pdf/9472194)

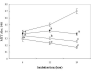

Supplement: MOESM2 [file 9472194]
